# Supplementary material
Source: Springer Nature journal article supplement (https://www.springermedizin.de/resource/supplementary/13020_2008_46_MOESM8_ESM.pdf/9640862)

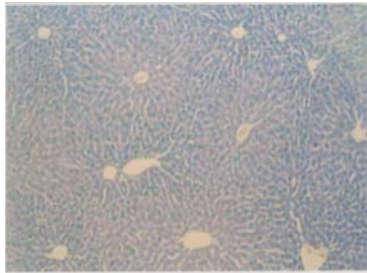

Normal

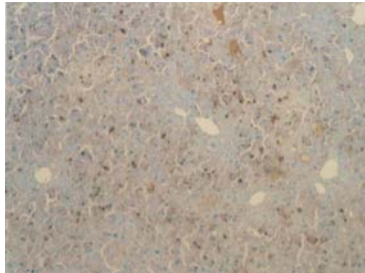

Model control

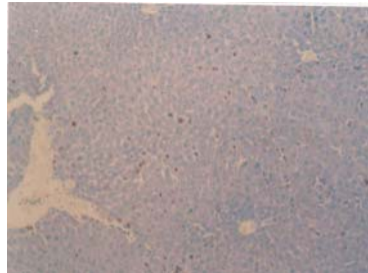

FZHY treated

Supplement: MOESM8 [file 9640862]
